# Supplementary material for: Employment Status and Work Ability in Adults with Cystic Fibrosis
Source: MDPI journal article supplement (doi:10.3390/ijerph182211776), 2021-11-10
Supplement: s1 [file s1]

**Table S1.** Possible predictive factors for employment.

| Variable                                                        | N   | Worker yes/no |            | p-value          |
|-----------------------------------------------------------------|-----|---------------|------------|------------------|
|                                                                 |     | OR            | 95% CI     |                  |
| <b>Age</b>                                                      | 196 | 1.07          | 1.04, 1.11 | <b>&lt;0.001</b> |
| <b>Sex</b>                                                      | 196 |               |            | <b>&lt;0.001</b> |
| Female                                                          |     | —             | —          |                  |
| Male                                                            |     | 2.73          | 1.54, 4.91 |                  |
| <b>BMI</b>                                                      | 196 | 1.01          | 0.95, 1.08 | 0.734            |
| <b>Age at CF diagnosis</b>                                      | 196 | 1.03          | 1.02, 1.05 | <b>&lt;0.001</b> |
| <b>Sport</b>                                                    | 196 |               |            | 0.067            |
| Yes                                                             |     | 0.81          | 0.37, 1.77 |                  |
| No                                                              |     | 1.87          | 0.74, 4.82 |                  |
| In the past                                                     |     | —             | —          |                  |
| <b>Smoker</b>                                                   | 196 |               |            | <b>&lt;0.001</b> |
| Yes                                                             |     | 2.58          | 0.52, 14.7 |                  |
| No                                                              |     | 0.35          | 0.11, 1.02 |                  |
| In the past                                                     |     | —             | —          |                  |
| <b>Educational level</b>                                        | 196 |               |            | <b>0.037</b>     |
| Primary/Secondary school                                        |     | —             | —          |                  |
| High school diploma/Enrolled in university                      |     | 1.02          | 0.49, 2.15 |                  |
| Degree/Post-graduate degree                                     |     | 2.47          | 1.02, 6.13 |                  |
| <b>Marital status</b>                                           | 195 |               |            |                  |
| Single                                                          |     | —             | —          | <b>0.007</b>     |
| In a relationship                                               |     | 2.50          | 1.38, 4.58 |                  |
| Separated/Divorced                                              |     | 2.91          | 0.55, 21.6 |                  |
| <b>Children</b>                                                 | 196 |               |            | 0.155            |
| No                                                              |     | —             | —          |                  |
| Yes                                                             |     | 1.66          | 0.83, 3.42 |                  |
| <b>Spirometric parameters</b>                                   |     |               |            |                  |
| FEV1 L                                                          | 196 | 1.27          | 1.00, 1.63 | <b>0.050</b>     |
| FEV1 %                                                          | 196 | 1.01          | 1.00, 1.02 | 0.280            |
| FVC L                                                           | 196 | 1.38          | 1.09, 1.75 | <b>0.006</b>     |
| FVC %                                                           | 196 | 1.01          | 1.00, 1.02 | 0.121            |
| FEV1/FVC                                                        | 196 | 0.99          | 0.97, 1.01 | 0.320            |
| <b>Hospital admission last year</b>                             | 196 |               |            | 0.621            |
| No                                                              |     | —             | —          |                  |
| Yes                                                             |     | 0.78          | 0.29, 2.07 |                  |
| <b>Oxygen therapy last year</b>                                 | 196 |               |            | 0.175            |
| No                                                              |     | —             | —          |                  |
| Yes                                                             |     | 0.47          | 0.14, 1.39 |                  |
| <b>IV antibiotic courses last year</b>                          | 196 |               |            | 0.427            |
| No                                                              |     | —             | —          |                  |
| Yes                                                             |     | 0.73          | 0.33, 1.59 |                  |
| <b>Cough in the previous 15 days</b>                            | 196 |               |            | 0.610            |
| No                                                              |     | —             | —          |                  |
| Yes                                                             |     | 0.84          | 0.43, 1.64 |                  |
| <b>Cystic Fibrosis Questionnaire-Revised (CFQ-R) subdomains</b> |     |               |            |                  |
| Physical functioning                                            | 196 | 1.01          | 1.00, 1.02 | <b>0.035</b>     |
| Vitality                                                        | 196 | 1.01          | 0.99, 1.02 | 0.427            |
| Emotional functioning                                           | 196 | 1.01          | 1.00, 1.03 | 0.065            |
| Eating problems                                                 | 196 | 1.01          | 1.00, 1.03 | 0.086            |
| Treatment Burden                                                | 196 | 1.02          | 1.00, 1.03 | <b>0.009</b>     |
| Health Perceptions                                              | 196 | 1.00          | 0.99, 1.02 | 0.619            |
| Social functioning                                              | 196 | 0.99          | 0.98, 1.01 | 0.503            |

|                      |     |      |            |              |
|----------------------|-----|------|------------|--------------|
| Body image           | 196 | 1.02 | 1.00, 1.03 | <b>0.009</b> |
| Role functioning     | 196 | 1.02 | 1.00, 1.03 | <b>0.017</b> |
| Weight               | 196 | 1.00 | 0.99, 1.01 | 0.802        |
| Respiratory symptoms | 196 | 1.01 | 1.00, 1.03 | 0.141        |
| Digestive symptoms   | 196 | 1.00 | 0.99, 1.02 | 0.502        |
